# Supplementary material for: Are the Eatwell Guide and Nutrient Profiling Models Consistent in the UK?
Source: MDPI journal article supplement (doi:10.3390/nu13082732), 2021-08-09
Supplement: s1 [file s1]

**Are the Eatwell Guide and Nutrient Profiling Models consistent in the UK?**

**Supplementary data**

## Tables

**Table S1: EWG recommendations**

|                                          |                                                           |
|------------------------------------------|-----------------------------------------------------------|
| <b>Nutrients</b>                         |                                                           |
| <b>Energy<sup>1</sup></b>                | 2250 kcal (9414 MJ)                                       |
| <b>Carbohydrates</b>                     | ≥50% of food energy                                       |
| <b>Free sugars</b>                       | ≤5% food energy                                           |
| <b>Fat</b>                               | ≤35% food energy                                          |
| <b>Saturated fat</b>                     | ≤11% food energy                                          |
| <b>Protein</b>                           | ≥15.5% of energy                                          |
| <b>Salt</b>                              | ≤ 6g/d (2363 mg sodium/d)                                 |
| <b>Fibre (AOAC)</b>                      | ≥30g/d                                                    |
| <b>Foods</b>                             |                                                           |
| <b>Fruits and vegetables<sup>2</sup></b> | ≥5 portions a day                                         |
| <b>Fish</b>                              | ≥ 2 portions (2*140g) a week, one of which should be oily |
| <b>Red and processed meat</b>            | ≤70g/day                                                  |

<sup>1</sup> Energy intake recommendation assumes mixed population average, so it was not included in the scoring system

<sup>2</sup> Fruit and vegetable intake includes a maximum of 1 portion of juice (from fruit / vegetable juice or that in a smoothie); 1 portion of beans; (portion sizes: 30 g dried fruit; combined total of 150 ml of fruit and / or vegetable juice and / or smoothie; 80 g all other fruits & vegetables).

**Table S2: Basis of the nutrient/food component and scoring for the UK NPM 2005 and the draft 2018 NPM**

| UK NPM 2005                                                          |           |        |            |         |      |        |       |      | Draft 2018 NPM                                                   |           |         |            |         |     |        |       |
|----------------------------------------------------------------------|-----------|--------|------------|---------|------|--------|-------|------|------------------------------------------------------------------|-----------|---------|------------|---------|-----|--------|-------|
| UK NPM 2004/5 Based on 8,950kJ (2,130kcal) diet, 3.75% scoring bands |           |        |            |         |      |        |       |      | Modifications: Based on 8,400kJ (2,000kcal); 3.75% scoring bands |           |         |            |         |     |        |       |
| 'A' points                                                           |           |        | 'C' points |         |      |        |       |      | 'A' points                                                       |           |         | 'C' points |         |     |        |       |
| Energy                                                               | Saturated | Total  | Sodium     | Protein | FNV  | Fibre  | Fibre |      | Energy                                                           | Saturated | Free    | Salt       | Protein | FNV | Fibre  | Fibre |
| (kJ)                                                                 | fat (g)   | sugars | (mg)       | (g)     | (%)  | (AOAC) | (NSP) |      | (kJ)                                                             | fat (g)   | sugars  | (g)        | (g)     | (%) | (AOAC) | (NSP) |
|                                                                      |           | (g)    |            |         |      | (g)    | (g)   |      |                                                                  |           | (g)     |            |         |     | (g)    | (g)   |
| <b>Reference</b>                                                     | 8,950     | 11% of | 21% of     | 2,400   | 42 g | 400    | 24 g  | 18 g | 8,400                                                            | 11% of    | 5% of   | 6 g        | 42 g    | 400 | 30 g   | 22.5  |
|                                                                      | kJ        | food   | food       | mg      |      | g      |       |      | kJ                                                               | food      | total   |            |         | g   |        | g     |
|                                                                      |           | energy | energy     |         |      |        |       |      |                                                                  | energy    | dietary |            |         |     |        |       |
|                                                                      |           |        |            |         |      |        |       |      |                                                                  |           | energy  |            |         |     |        |       |
| <b>0</b>                                                             | ≤ 335     | 1      | 4.5        | 90      | 1.6  | 40     | 0.9   | 0.7  | 315                                                              | 0.9       | 0.9     | 0.2        | 1.6     | 40  | 0.7    | 0.6   |
| <b>1</b>                                                             | > 335     | 1      | 4.5        | 90      | 1.6  | 40     | 0.9   | 0.7  | 315                                                              | 0.9       | 0.9     | 0.2        | 1.6     | 40  | 0.7    | 0.6   |
| <b>2</b>                                                             | > 670     | 2      | 9          | 180     | 3.2  | 60     | 1.9   | 1.4  | 630                                                              | 1.9       | 1.9     | 0.5        | 3.2     | 60  | 1.4    | 1.1   |
| <b>3</b>                                                             | > 1005    | 3      | 13.5       | 270     | 4.8  | -      | 2.8   | 2.1  | 945                                                              | 2.8       | 2.8     | 0.7        | 4.8     | -   | 2.2    | 1.7   |
| <b>4</b>                                                             | > 1340    | 4      | 18         | 360     | 6.4  | -      | 3.7   | 2.8  | 1260                                                             | 3.7       | 3.7     | 0.9        | 6.4     | -   | 2.9    | 2.2   |
| <b>5</b>                                                             | > 1675    | 5      | 22.5       | 450     | 8    | 80     | 4.7   | 3.5  | 1575                                                             | 4.7       | 4.6     | 1.1        | 8       | 80  | 3.6    | 2.8   |
| <b>6</b>                                                             | > 2010    | 6      | 27         | 540     |      |        |       |      | 1890                                                             | 5.6       | 5.6     | 1.4        |         |     | 4.3    | 3.4   |
| <b>7</b>                                                             | > 2345    | 7      | 31         | 630     |      |        |       |      | 2205                                                             | 6.6       | 6.5     | 1.6        |         |     | 5.0    | 3.9   |
| <b>8</b>                                                             | > 2680    | 8      | 36         | 720     |      |        |       |      | 2520                                                             | 7.5       | 7.4     | 1.8        |         |     | 5.8    | 4.5   |
| <b>9</b>                                                             | > 3015    | 9      | 40         | 810     |      |        |       |      | 2835                                                             | 8.4       | 8.3     | 2.0        |         |     |        |       |
| <b>10</b>                                                            | > 3350    | 10     | 45         | 900     |      |        |       |      | 3150                                                             | 9.4       | 9.3     | 2.3        |         |     |        |       |

Calculating a nutrient profiling score:

- A maximum of 10 points can be awarded for each nutrient/component (energy, saturated fat, sugar and salt). The total 'A' points are the sum of the points scored for each nutrient/ food component. Total 'A' points = [points for energy] + [points for saturated fat] + [points for free sugars] + [points for salt]
- A maximum of 5 points can be awarded for protein and fruit, vegetables and nuts. A maximum of 8 points can be awarded for fibre (either as AOAC or NSP). The total 'C' points are the sum of the points for each nutrient/ food component. Total 'C' points = [points for fruit, vegetables and nut content] + [points for fibre (either NSP or AOAC)] + [points for protein]
- The nutrient profiling score is calculated as total 'A' minus total 'C' points
- If a food or drink scores 11 or more 'A' points then it cannot score points for protein unless it also scores 5 points for fruit, vegetables and nuts.
- A food is classified as 'less healthy' where it scores 4 points or more
- A drink is classified as 'less healthy' where it scores 1 point or more

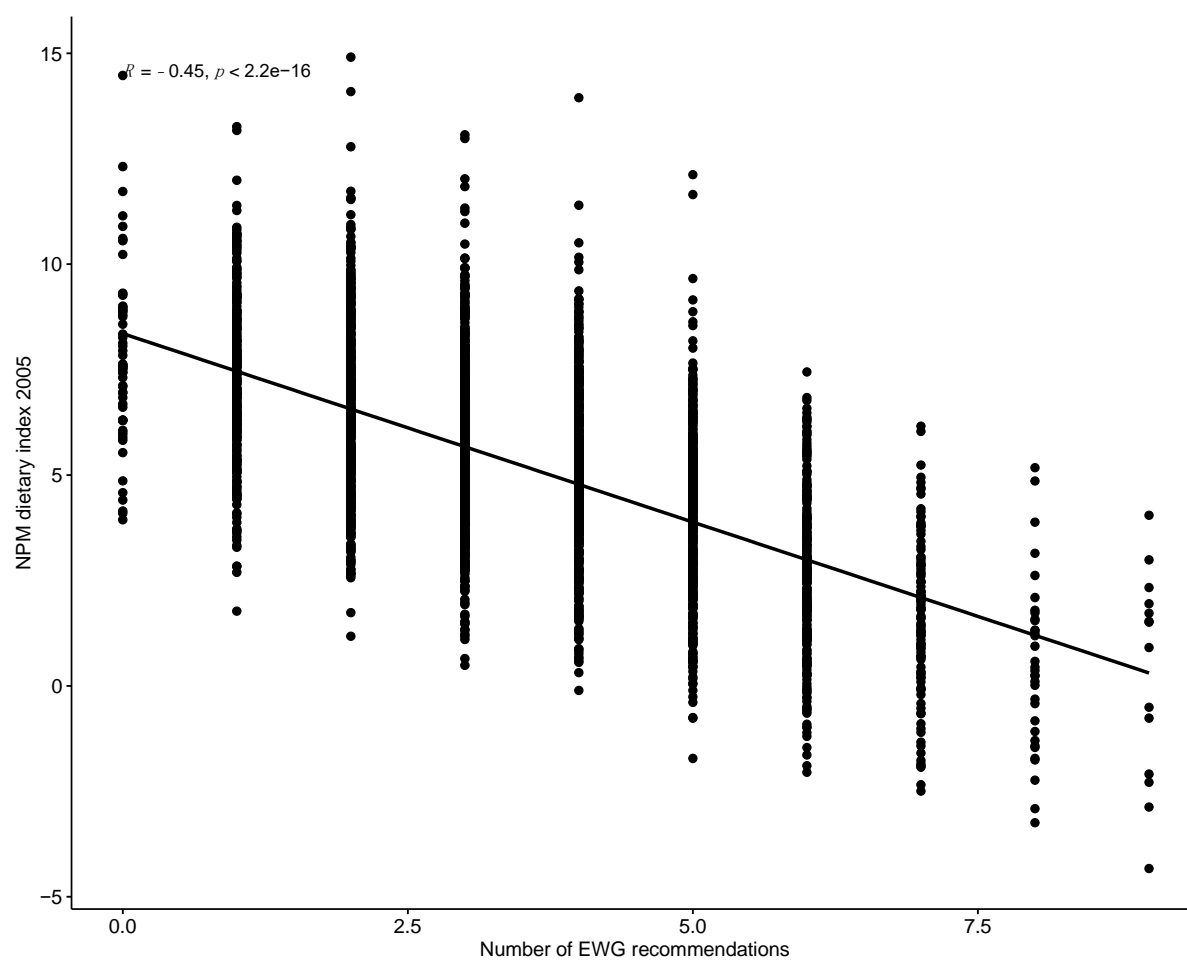

**Figure S1: Scatter plot of NPM dietary index 2005 by number of achieved EWG recommendations**

The higher the NPM dietary index 2005, the less healthy the diet is; the higher the EWG score, the healthier the diet is.

EWG, Eatwell guide; NPM, nutrient profiling model

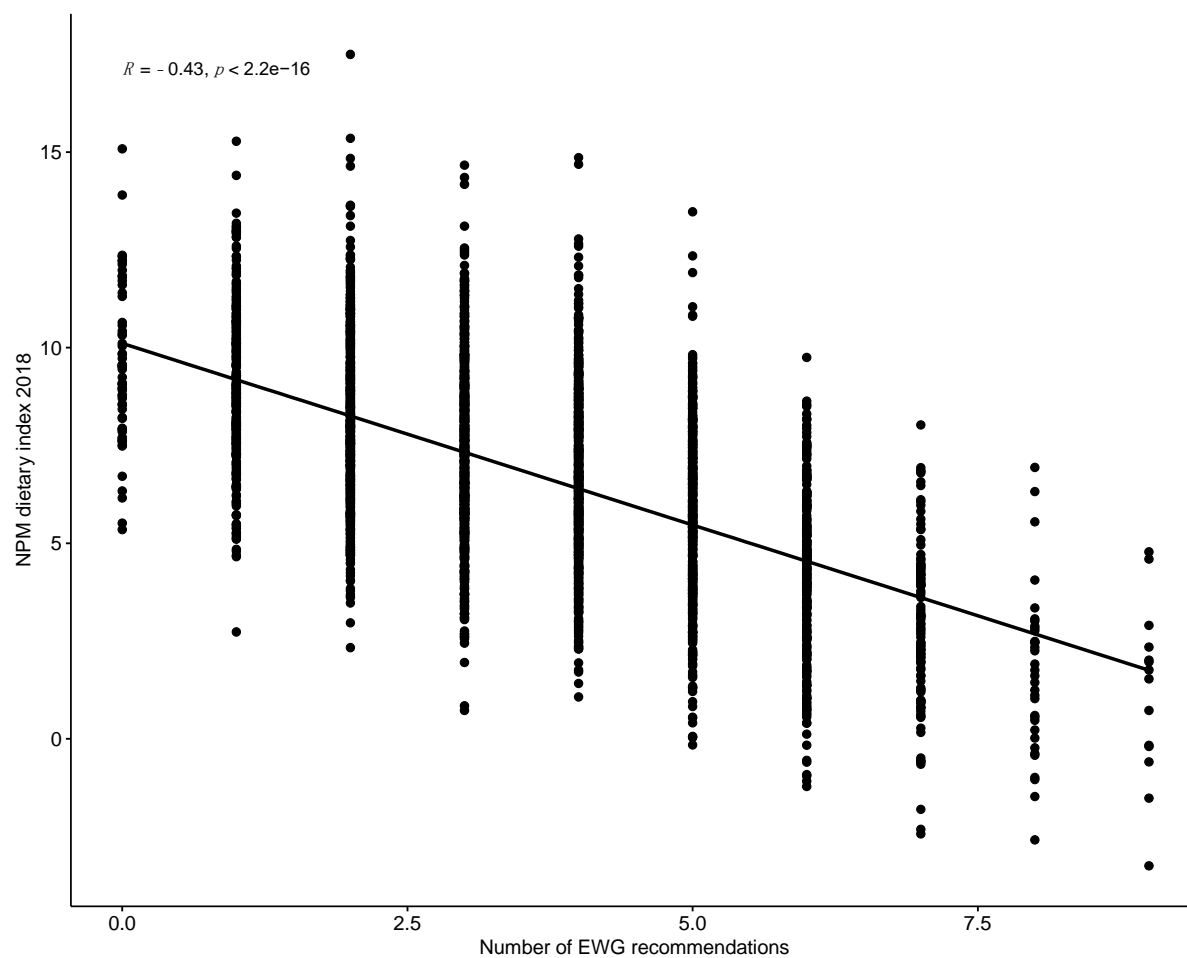

**Figure S2: Scatter plot of NPM dietary index 2018 by number of achieved EWG recommendations**

The higher the NPM dietary index 2018, the less healthy the diet is; the higher the EWG score, the healthier the diet is.

EWG, Eatwell guide; NPM, nutrient profiling model
